# Supplementary material for: Comprehensive Analyses of PANoptosome with Potential Implications in Cancer Prognosis and Immunotherapy
Source: Biochem Genet. 2024 Mar 4;63(1):331–53. doi: 10.1007/s10528-024-10687-8 (PMC11832696; doi:10.1007/s10528-024-10687-8)
Supplement: Supplementary file 10 — Supplementary file10 (XLSX 122 kb) [file 10528_2024_10687_MOESM10_ESM.xlsx]

## Sheet: Table S1
Cancer types	Abbreviation
Adrenocortical carcinoma	ACC
Bladder Urothelial Carcinoma	BLCA
Breast invasive carcinoma	BRCA
Cervical squamous cell carcinoma and endocervical adenocarcinoma	CESC
Cholangiocarcinoma	CHOL
Colon adenocarcinoma	COAD
Lymphoid Neoplasm Diffuse Large B-cell Lymphoma	DLBC
Esophageal carcinoma	ESCA
Glioblastoma multiforme	GBM
Head and Neck squamous cell carcinoma	HNSC
Kidney Chromophobe	KICH
Kidney renal clear cell carcinoma	KIRC
Kidney renal papillary cell carcinoma	KIRP
Acute Myeloid Leukemia	LAML
Brain Lower Grade Glioma	LGG
Liver hepatocellular carcinoma	LIHC
Lung adenocarcinoma	LUAD
Lung squamous cell carcinoma	LUSC
Mesothelioma	MESO
Ovarian serous cystadenocarcinoma	OV
Pancreatic adenocarcinoma	PAAD
Pheochromocytoma and Paraganglioma	PCPG
Prostate adenocarcinoma	PRAD
Rectum adenocarcinoma	READ
Sarcoma	SARC
Skin Cutaneous Melanoma	SKCM
Stomach adenocarcinoma	STAD
Testicular Germ Cell Tumors	TGCT
Thyroid carcinoma	THCA
Thymoma	THYM
Uterine Corpus Endometrial Carcinoma	UCEC
Uterine Carcinosarcoma	UCS
Uveal Melanoma	UVM

## Sheet: Table S2
Symbol	GBM		LGG		CESC		LUAD		COAD		LAML		BRCA		ESCA		SARC		KIRP		STAD		PRAD		UCEC		HNSC		KIRC		LUSC		THYM		LIHC		THCA		MESO		READ		SKCM		PAAD		OV		TGCT
	p value	HR	p value	HR	p value	HR	p value	HR	p value	HR	p value	HR	p value	HR	p value	HR	p value	HR	p value	HR	p value	HR	p value	HR	p value	HR	p value	HR	p value	HR	p value	HR	p value	HR	p value	HR	p value	HR	p value	HR	p value	HR	p value	HR	p value	HR	p value	HR	p value
NLRP3	0.221805	1.1055	0.115692	1.12808	0.342863	0.914606	0.137825	0.91811	0.862747	1.0158	0.136917	1.13556	0.351036	0.935876	0.317175	1.08676	0.183611	0.920216	0.0698559	0.810973	0.18123	1.08297	0.68229	0.901031	0.946174	0.991172	0.309163	0.952621	0.735824	0.977259	0.107141	1.0935	0.12167	1.67801	0.774996	1.0177	0.947106	0.986536	0.962021	1.00738	0.198063	0.779187	0.000400742	0.842011	0.96602	0.996662	0.599283	1.0253	0.112427
RIPK1	0.0987942	1.26384	3.0801e-12	2.97375	0.98581	0.9966	0.795893	1.03465	0.856175	0.959826	0.289646	1.26814	0.258643	1.17496	0.915304	1.02498	0.209022	0.819627	0.270227	0.781638	0.875301	0.977325	0.906576	0.930352	0.658845	0.889579	0.135662	0.846715	0.00560925	0.743628	0.105227	1.23397	0.281772	0.568671	0.265275	1.16351	0.0803713	2.98611	0.294672	0.772067	0.24599	0.574374	0.500313	1.08023	0.675747	0.922144	0.493196	0.950781	0.818651
RIPK3	0.099412	1.17016	2.08745e-07	1.61103	0.382729	1.09449	0.0731947	0.864844	0.283868	0.806798	0.0104186	1.38405	0.307281	0.943898	0.268688	1.08841	0.000258186	0.78306	0.657841	0.950499	0.973935	1.0027	0.792267	0.931646	0.360804	0.897974	0.164942	0.932097	0.79865	1.02328	0.149963	1.11661	0.534494	0.700829	0.240862	0.923747	0.589118	1.20807	0.0593816	0.789594	0.319522	0.670416	0.00470766	0.88417	0.0223942	1.25483	0.370317	0.957003	0.091474
CASP1	0.161526	1.13969	4.80012e-10	1.64419	0.817931	1.02168	0.762023	0.978399	0.389408	0.926296	0.00776625	1.24914	0.297173	0.927158	0.878324	0.98422	0.0718222	0.890575	0.296834	0.852338	0.304325	0.942658	0.342755	0.7394	0.478543	0.908719	0.190336	1.09675	0.674795	0.965849	0.442297	1.06414	0.00453576	3.75306	0.410118	1.06992	0.707257	0.899379	3.48701e-05	0.553712	0.096499	0.773739	0.0480862	0.930611	0.00972784	1.32011	0.633465	0.978427	0.0735114
CASP6	0.273223	1.16802	3.7656e-13	2.00629	0.784198	1.04518	0.0160875	1.32061	0.350107	0.856449	0.199821	0.854237	0.510564	1.07858	0.691066	0.947455	0.211679	1.21479	0.923654	1.02572	0.158122	0.861816	0.327923	1.69626	0.0860712	0.736186	0.586571	1.054	0.0434964	0.768124	0.393904	1.09184	0.956168	0.966352	0.0832291	1.23181	0.153119	2.15564	0.348576	0.887958	0.00219702	0.313568	0.859214	0.983656	0.00723293	1.49372	0.113542	0.910148	0.812884
CASP8	0.229525	1.14818	9.51839e-17	2.11211	0.247816	1.20532	0.629646	1.05465	0.339167	0.784716	0.247689	1.29729	0.768737	0.968181	0.346905	1.17066	0.143818	0.836475	0.147413	1.34885	0.316708	0.881302	0.335732	1.42292	0.773562	0.959316	0.913753	1.00878	0.309867	0.908417	0.39276	1.09191	0.732451	0.88796	0.0542124	1.19986	0.542951	1.27284	0.223052	0.835758	0.00497357	0.414592	5.05631e-05	0.773758	0.00355736	1.42837	0.0393884	0.887842	0.463135
PYCARD	0.0666229	1.22204	3.54352e-05	1.43103	0.280167	0.890949	0.0787369	1.14298	0.471664	1.10346	0.00281635	1.48048	0.157583	0.915032	0.928573	0.987757	0.000350193	0.754644	0.432045	0.899018	0.0856484	0.84846	0.596833	0.846085	0.32321	0.879597	0.888225	0.988046	8.67132e-05	1.36867	0.429807	1.05884	0.295191	1.80495	0.186253	1.07686	0.780162	0.92123	0.96066	0.990699	0.362642	0.743103	0.130769	0.936901	0.0302913	1.28467	0.498847	0.959463	0.403593
FADD	0.202151	1.27444	3.3265e-07	2.40881	0.0366449	1.31323	0.000105189	1.64747	0.702637	1.08869	0.0307691	1.47207	0.779068	1.0248	0.722206	0.966105	0.946912	0.989142	0.614652	0.898283	0.195361	0.856923	0.0209436	4.87727	0.329262	0.879921	0.000704672	1.1862	0.0344933	0.792597	0.0693156	1.13308	0.676284	0.828203	0.0145855	1.32152	0.220278	0.621877	0.1094	0.705226	0.0230401	0.554781	0.0676344	1.19022	0.00806387	1.59448	0.741496	1.02847	0.556099
[truncated: 17 more columns]

## Sheet: Table S3
Hallmark pathway	ACC		BLCA		BRCA		CESC		CHOL		COAD		READ		DLBC		ESCA		GBM		HNSC		KICH		KIRC		KIRP		LGG		LIHC		LUAD		LUSC		MESO		OV		PAAD		PCPG		PRAD		SARC		SKCM
	correlation	p value	cor	p value	cor	p value	cor	p value	cor	p value	cor	p value	cor	p value	cor	p value	cor	p value	cor	p value	cor	p value	cor	p value	cor	p value	cor	p value	cor	p value	cor	p value	cor	p value	cor	p value	cor	p value	cor	p value	cor	p value	cor	p value	cor	p value	cor	p value	cor
HALLMARK_TNFA_SIGNALING_VIA_NFKB	0.550222	2.17501e-07	0.469921	9.51231e-24	0.107628	0.000353321	0.340574	9.53115e-10	0.428129	0.00919051	0.1393	0.0180172	0.295599	0.0436661	0.187188	0.011396	0.625917	2.48923e-19	0.322026	5.19e-14	0.336576	0.00572318	0.261633	9.26056e-10	0.32305	1.91576e-08	0.441917	1.15292e-09	0.573976	4.52449e-47	0.354637	1.95315e-12	0.463562	8.45688e-29	0.302052	5.78e-12	0.0304861	0.779242	0.499727	2.34e-28	0.433128	1.4e-09	0.0924262	0.214619	0.188604	2.36e-05	0.0406081	0.700732	0.570475
HALLMARK_HYPOXIA	0.347487	0.00195878	0.322878	2.50036e-11	-0.0255663	0.397363	0.138098	0.0156306	0.0340859	0.84355	0.0991664	0.0930092	0.275344	0.061038	0.155546	0.0360154	0.434789	5.36613e-09	0.108797	0.0130521	0.117128	0.348965	0.126326	0.00354761	0.112949	0.0551173	0.307189	3.93971e-05	0.490935	5.13323e-33	0.194712	0.000160684	0.275814	1.91602e-10	0.0375788	0.402709	-0.129452	0.232078	0.295813	4.52e-10	0.314945	1.76e-05	0.227149	0.00204443	0.238145	7.97e-08	0.0855999	0.417188	0.134628
HALLMARK_CHOLESTEROL_HOMEOSTASIS	-0.2099	0.0669204	-0.142137	0.00406222	-0.0447142	0.138685	-0.0159636	0.780918	-0.0485972	0.778358	0.156677	0.00772641	0.360825	0.012715	-0.0103349	0.88987	0.109658	0.160884	-0.102403	0.0195084	-0.0795308	0.525576	0.000970542	0.982199	0.279742	1.35296e-06	0.228959	0.00244552	0.0232946	0.595409	-0.121638	0.0190932	-0.00265347	0.952099	-0.0287095	0.522693	-0.111497	0.303884	0.284517	2.15e-09	0.257165	0.000510554	0.0868756	0.243555	-0.154436	0.00055747	0.129578	0.218294	-0.0503838
HALLMARK_MITOTIC_SPINDLE	-0.0682523	0.555322	-0.0355794	0.47411	-0.300089	2.76375e-24	-0.213017	0.000173892	-0.189603	0.268055	-0.358662	3.60915e-10	-0.464412	0.00100746	-0.0430685	0.563743	-0.531123	2.15349e-13	-0.108053	0.0136907	0.0276424	0.825622	-0.0794438	0.0673641	-0.299149	2.18751e-07	-0.230081	0.00232472	-0.0981442	0.0249373	0.136635	0.00840723	-0.218993	5.20214e-07	-0.130317	0.00357679	-0.273701	0.0103124	-0.354664	4.21e-14	0.287777	9.38e-05	-0.084398	0.257312	-0.425809	2.9e-23	-0.141664	0.177974	-0.411068
HALLMARK_WNT_BETA_CATENIN_SIGNALING	-0.113543	0.325498	0.0509878	0.304824	-0.0242703	0.421729	-0.133765	0.0192383	0.0466151	0.787186	-0.0887986	0.132741	-0.0447516	0.765177	0.272939	0.00019315	-0.416474	2.63783e-08	-0.0839882	0.0556203	-0.154492	0.215504	-0.161588	0.000184489	-0.219575	0.000168142	-0.178162	0.0190191	-0.0755949	0.0844429	0.0182851	0.725561	-0.150386	0.000617049	-0.139488	0.00180702	-0.396837	0.000141565	-0.341389	4.08e-13	0.147703	0.0484812	0.21191	0.00408123	0.128174	0.00424745	-0.207427	0.0472552	-0.0957266
HALLMARK_TGF_BETA_SIGNALING	0.299467	0.0081487	0.202961	3.70715e-05	-0.167048	2.57432e-08	-0.00211968	0.970543	0.0477807	0.781992	-0.1052	0.0746695	-0.159913	0.282951	0.0164285	0.825777	0.262497	0.00065889	0.162663	0.000195162	-0.21126	0.0886115	-0.231149	7.1631e-08	-0.193241	0.000959873	0.0362767	0.635612	0.420964	7.77492e-24	0.116871	0.0243713	0.0977864	0.0264829	0.116839	0.00906078	-0.393245	0.000164633	0.0512644	0.29055	0.278138	0.000163366	0.0732087	0.326024	-0.0674896	0.13336	0.0222144	0.833523	-0.0583523
HALLMARK_IL6_JAK_STAT3_SIGNALING	0.70599	7.43654e-13	0.528528	1.15426e-30	0.177077	3.46919e-09	0.426118	6.26798e-15	0.448646	0.00606117	0.181519	0.00198266	0.22283	0.132192	-0.00832774	0.91116	0.795777	2.44344e-37	0.30249	1.83e-12	0.571696	5.33582e-07	0.596717	1.58669e-52	0.530777	2.09768e-22	0.398657	5.56006e-08	0.767491	1.75985e-102	0.457268	1.43776e-20	0.551681	2.3773e-42	0.379089	1.82e-18	0.228925	0.0329412	0.581473	5.47e-40	0.40173	2.49e-08	0.32008	1.06e-05	0.326574	8.63e-14	0.111935	0.288098	0.705874
HALLMARK_DNA_REPAIR	0.0383891	0.740285	0.0787107	0.112852	0.189441	2.4905e-10	0.0439986	0.443151	0.500832	0.00186377	0.317347	3.68994e-08	-0.212325	0.151907	0.312097	1.79455e-05	-0.145764	0.0617441	0.066615	0.129245	0.057849	0.64453	0.428786	3.68385e-25	0.165636	0.00475567	0.142145	0.0621041	0.257783	2.27505e-09	0.198492	0.000118755	0.0237796	0.590295	-0.0573663	0.201243	0.179603	0.0960002	0.0764753	0.114574	0.307466	2.83e-05	0.264709	0.000304849	0.252455	1.19e-08	-0.103166	0.327769	0.210946
HALLMARK_G2M_CHECKPOINT	-0.191097	0.0959484	-0.0205919	0.678733	-0.207672	3.66563e-12	-0.194473	0.000624631	0.0132263	0.938973	-0.15033	0.0106301	-0.474648	0.000749277	0.201005	0.00651147	-0.492021	1.92475e-11	-0.0863694	0.0490145	-0.131451	0.292764	0.132955	0.00213944	-0.188065	0.00131838	-0.122748	0.107642	-0.0270408	0.537604	0.153941	0.00295055	-0.178176	4.77841e-05	-0.123254	0.00588494	-0.215955	0.0445439	-0.244878	3e-07	0.372709	2.78e-07	-0.104921	0.158658	-0.298879	1.08e-11	-0.100614	0.339941	-0.304759
HALLMARK_APOPTOSIS	0.713205	3.39803e-13	0.44945	1.24785e-21	0.215544	5.23045e-13	0.289994	2.42453e-07	0.35967	0.0311976	0.0939701	0.111539	0.237719	0.107617	0.146602	0.048288	0.676558	1.99684e-23	0.141101	0.00125526	0.391283	0.00115959	0.353073	4.92351e-17	0.292288	4.23137e-07	0.20905	0.00577572	0.573156	6.52222e-47	0.347947	5.34949e-12	0.507804	4.14396e-35	0.251922	1.2e-08	0.0652495	0.54821	0.45695	2.04e-23	0.45022	2.56e-10	0.294789	5.35e-05	0.245262	3.14e-08	0.101524	0.335565	0.537728
HALLMARK_NOTCH_SIGNALING	0.351818	0.00170302	0.14353	0.00371094	-0.012729	0.673518	-0.0681481	0.234594	-0.314446	0.0617919	0.0318734	0.590098	0.381771	0.00809849	-0.0876432	0.239399	-0.288449	0.000171826	0.111967	0.0106144	-0.0718984	0.566179	-0.0101899	0.81478	-0.190165	0.00116017	0.412909	1.64654e-08	0.269936	3.62754e-10	0.100033	0.0542179	0.0917139	0.0374661	0.14168	0.00152561	-0.303831	0.00422412	-0.116465	0.0160501	0.511804	2.44e-13	0.22141	0.00266654	0.00938013	0.83493	0.0436015	0.679834	0.154417
HALLMARK_ADIPOGENESIS	0.0342483	0.76746	-0.1418	0.00415159	0.124871	3.33544e-05	0.0178987	0.75516	-0.302325	0.0731115	0.167974	0.0042558	0.243857	0.0985704	-0.367674	3.29044e-07	0.64301	1.25724e-20	-0.179393	3.88e-05	-0.205876	0.0972361	-0.182422	2.34466e-05	0.119861	0.0417356	0.4589	2.1554e-10	0.476207	6.65164e-31	-0.305945	1.76657e-09	0.246193	1.50682e-08	0.112776	0.0117886	-0.0327704	0.763169	0.396202	1.68e-17	0.0432005	0.565831	0.220836	0.00273741	0.070282	0.117997	0.14298	0.173937	0.142562
HALLMARK_ESTROGEN_RESPONSE_EARLY	0.0996424	0.388574	0.0856033	0.0845568	0.195903	5.84714e-11	0.109072	0.0566691	0.0450484	0.794182	0.206802	0.000411577	0.112928	0.449786	-0.0107287	0.885702	0.303914	7.23434e-05	-0.0529501	0.228054	0.0740674	0.554492	0.00325626	0.940327	0.0639449	0.278604	-0.0586708	0.443224	-0.0025292	0.95403	0.116633	0.0246659	0.0916279	0.0376459	0.143274	0.00134682	0.120494	0.26627	0.336921	8.56e-13	0.394196	4.77e-08	0.0963592	0.195661	0.100308	0.025486	0.245357	0.0184056	-0.0890298
HALLMARK_ESTROGEN_RESPONSE_LATE	0.100969	0.382259	0.120778	0.0147669	0.26747	1.92238e-19	0.181205	0.00145648	0.142067	0.408507	0.269047	3.62679e-06	0.144264	0.333313	0.108044	0.146555	0.55241	1.44845e-14	-0.0824732	0.0601961	0.24378	0.0485519	0.18841	1.23912e-05	0.292733	4.05609e-07	0.134762	0.0771034	0.354366	6.8633e-17	0.301162	3.23523e-09	0.231767	1.04081e-07	0.231911	1.66e-07	0.186994	0.0828703	0.432159	7.39e-21	0.473107	2.27e-11	0.178842	0.0157094	0.419297	1.54e-22	0.279877	0.0068923	0.0925738
HALLMARK_ANDROGEN_RESPONSE	-0.109038	0.345182	-0.0515694	0.299333	-0.208018	3.37043e-12	-0.176883	0.00189602	-0.228087	0.180917	-0.226735	0.000103703	-0.152376	0.306547	-0.26639	0.000278048	0.185887	0.0168264	-0.11964	0.00630522	-0.515099	9.62976e-06	-0.316378	8.27499e-14	-0.0705582	0.231781	-0.539682	1.83463e-14	-0.0828543	0.0585292	-0.228693	8.62017e-06	-0.0513586	0.244648	0.0705144	0.116044	-0.303466	0.00427241	0.230716	1.45e-06	0.0176012	0.815096	-0.16458	0.0264072	-0.596788	3.52e-49	0.117308	0.265433	-0.172075
HALLMARK_MYOGENESIS	0.525131	9.42942e-07	0.109909	0.0266067	0.133064	9.69408e-06	0.0292581	0.610176	0.00195328	0.990979	0.0805818	0.172634	0.149461	0.316002	0.108927	0.143267	0.389795	2.27755e-07	0.0401919	0.36036	0.196887	0.113077	0.0657243	0.130386	0.272102	2.67166e-06	0.289055	0.000114774	0.309084	5.10736e-13	0.308034	1.35167e-09	0.22296	3.18831e-07	0.052189	0.245028	-0.257001	0.0162618	0.141115	0.00347705	0.086205	0.251216	0.341206	2.43e-06	0.240153	6.15e-08	0.119012	0.258503	-0.277235
HALLMARK_PROTEIN_SECRETION	-0.0808112	0.484764	-0.114712	0.0206265	-0.34968	6.24729e-33	-0.143805	0.0117903	-0.320464	0.0567124	-0.354107	6.21792e-10	-0.192646	0.194513	-0.416524	4.96115e-09	0.045932	0.557989	-0.0348497	0.427763	-0.479221	4.68531e-05	-0.338733	1.00995e-15	-0.293116	3.91101e-07	-0.270783	0.000314173	-0.124531	0.00437908	-0.165517	0.00137701	-0.190375	1.36364e-05	-0.137268	0.00213981	-0.218146	0.0423753	0.104356	0.0310846	-0.380149	1.53e-07	-0.4213	3.17e-09	-0.553687	3.45e-41	0.0330691	0.754329	-0.194009
HALLMARK_INTERFERON_ALPHA_RESPONSE	0.533741	5.77666e-07	0.500372	3.56217e-27	0.239529	8.59501e-16	0.394506	7.7497e-13	0.303112	0.0723307	0.274648	2.22359e-06	0.418344	0.00343018	0.135072	0.0690638	0.530697	2.2688e-13	0.289052	1.82e-11	0.539834	2.90098e-06	0.486007	7.91549e-33	0.510291	1.45189e-20	0.12245	0.108504	0.663779	1.34279e-67	0.330461	6.66755e-11	0.443002	3.63306e-26	0.374628	4.87e-18	0.418357	5.52294e-05	0.378776	5.14e-16	0.563162	2.29e-16	0.316429	1.35e-05	0.383682	7.65e-19	0.215528	0.0390823	0.509669
HALLMARK_INTERFERON_GAMMA_RESPONSE	0.671585	2.30372e-11	0.527209	1.71084e-30	0.201938	1.44309e-11	0.397142	5.28661e-13	0.438383	0.00748757	0.206581	0.000417638	0.30377	0.0379126	0.151417	0.0413075	0.70971	1.3982e-26	0.264048	9.62e-10	0.588954	1.9747e-07	0.520735	3.06705e-38	0.559401	3.39919e-25	0.367542	6.5438e-07	0.705495	8.70156e-80	0.416817	5.02522e-17	0.484259	1.22978e-31	0.390237	1.46e-19	0.371158	0.000401401	0.516223	1.87e-30	0.497831	1.34e-12	0.357733	7.13e-07	0.353477	4.82e-16	0.163979	0.118306	0.616895
HALLMARK_APICAL_JUNCTION	0.503403	3.06352e-06	0.371595	8.9781e-15	0.0294544	0.329509	0.22676	6.262e-05	0.144224	0.401354	0.0912621	0.122284	0.221118	0.135267	0.235048	0.00140319	0.139084	0.0748052	0.170771	9.09e-05	0.326581	0.00744447	0.248928	6.08495e-09	0.143188	0.0148422	-0.0437664	0.567486	0.264756	8.02444e-10	0.403427	5.92941e-16	0.349899	2.81051e-16	0.235191	1.1e-07	-0.192578	0.0739324	0.223463	3.11e-06	0.372388	2.85e-07	0.347338	1.56e-06	0.310493	1.51e-12	0.113494	0.28139	-0.0128968
HALLMARK_APICAL_SURFACE	0.156704	0.173511	0.352791	2.25938e-13	0.149224	6.80359e-07	0.298684	1.0067e-07	0.258978	0.127213	0.197759	0.000738502	0.349577	0.0160146	0.376892	1.56958e-07	0.295216	0.000118384	0.0524011	0.232919	0.266101	0.0308025	-0.0118867	0.784643	0.122704	0.0370863	0.155484	0.0410837	0.286769	2.44008e-11	0.382531	2.2485e-14	0.387548	6.67221e-20	0.315422	5.76e-13	0.0153587	0.887718	0.227032	2.14e-06	0.555052	7.46e-16	0.283917	0.000102709	0.399154	2.15e-20	0.185391	0.07685	0.43502
HALLMARK_HEDGEHOG_SIGNALING	-0.163692	0.154877	0.0964857	0.0517656	-0.286224	3.78813e-22	-0.252564	7.72372e-06	-0.0297716	0.863152	-0.170732	0.00365861	0.0757317	0.6129	0.0808231	0.278087	-0.362681	1.69025e-06	-0.0373123	0.395826	-0.33316	0.00626732	-0.230747	7.55661e-08	-0.134903	0.0217959	-0.336296	6.07726e-06	-0.53287	1.25945e-39	0.0800708	0.123672	-0.114735	0.00915956	-0.188246	2.36e-05	-0.488435	1.59127e-06	-0.208983	1.34e-05	-0.455888	1.43e-10	0.0246186	0.741487	-0.191563	1.74e-05	0.00922926	0.930421	-0.416112
HALLMARK_COMPLEMENT	0.787757	1.90974e-17	0.521386	9.51669e-30	0.165141	3.71862e-08	0.414355	3.99507e-14	0.224143	0.188781	0.114069	0.0531489	0.321906	0.0273452	-0.0676476	0.364212	0.783623	1.5862e-35	0.27635	1.44e-10	0.492071	2.71299e-05	0.484518	1.30869e-32	0.513243	8.02459e-21	0.464848	1.17181e-10	0.665116	5.85984e-68	0.328686	8.53862e-11	0.514273	4.12163e-36	0.341035	4.99e-15	0.19618	0.0685881	0.616517	4.63e-46	0.398961	3.17e-08	0.320926	1e-05	0.381522	1.24e-18	0.120213	0.253696	0.690969
HALLMARK_UNFOLDED_PROTEIN_RESPONSE	-0.113675	0.324931	0.0746705	0.13261	-0.28524	5.3153e-22	-0.10274	0.0727146	0.0663852	0.700475	0.0824896	0.162658	-0.247246	0.0938327	0.0571427	0.44355	0.0511828	0.51383	-0.00999728	0.820089	0.166035	0.182737	0.227946	1.09415e-07	-0.0240684	0.683678	-0.159159	0.0364756	0.229909	1.08717e-07	0.08518	0.101396	-0.150932	0.000589107	-0.1199	0.00739241	-0.120076	0.267944	0.0892367	0.0654377	-0.0735648	0.327747	-0.217041	0.00325008	-0.482545	2.72e-30	-0.0100021	0.924611	0.134976
HALLMARK_PI3K_AKT_MTOR_SIGNALING	0.0750276	0.516654	0.0790113	0.111479	-0.0632709	0.036059	-0.0140775	0.806255	-0.0412453	0.81123	-0.103917	0.0783006	-0.259601	0.0780419	0.18866	0.0107544	0.214396	0.00568776	-0.0405719	0.355832	-0.0159482	0.898864	0.124023	0.00420669	-0.040243	0.495592	-0.0114424	0.881226	0.186499	1.79909e-05	0.069247	0.183226	0.052144	0.237498	0.109835	0.014193	0.0868944	0.423543	0.155187	0.00129584	0.176923	0.0178263	-0.202865	0.00602243	-0.4271	2.07e-23	-0.0572883	0.587527	-0.0290231
HALLMARK_MTORC1_SIGNALING	-0.0637236	0.581917	0.108503	0.0286186	-0.224515	5.17692e-14	-0.0913884	0.110614	0.138845	0.419326	0.0573293	0.332308	-0.183514	0.216925	0.233276	0.0015285	0.212198	0.00621446	-0.154786	0.000396289	0.0292987	0.815353	0.121914	0.00490523	-0.00804496	0.891684	0.194704	0.0102587	0.177909	4.35741e-05	0.168656	0.00111029	-0.0377357	0.392782	-0.0740782	0.0986899	-0.107856	0.320046	0.200053	3.13e-05	0.253403	0.000620277	-0.0128739	0.863054	-0.335712	1.57e-14	0.0613528	0.561256	0.105642
HALLMARK_E2F_TARGETS	-0.167857	0.144505	-0.0490921	0.323179	-0.174958	5.35082e-09	-0.189012	0.000891104	0.0639104	0.711153	-0.0542573	0.358908	-0.419426	0.00333917	0.195724	0.00809878	-0.451424	1.16119e-09	-0.123961	0.00464232	-0.0693682	0.579956	0.214219	6.27142e-07	-0.153054	0.00916022	-0.0810594	0.28906	0.0106157	0.808806	0.137881	0.00782496	-0.148959	0.000696015	-0.138733	0.00191446	-0.145708	0.178105	-0.204984	1.97e-05	0.349812	1.59e-06	-0.0722908	0.332143	-0.150168	0.000793608	-0.0742293	0.481919	-0.288775
HALLMARK_MYC_TARGETS_V1	-0.177641	0.122197	-0.0048102	0.922929	-0.282326	1.43872e-21	-0.175753	0.00202935	0.302112	0.0733237	-0.0538185	0.362813	-0.516198	0.000203958	0.1722	0.0200994	-0.449532	1.38774e-09	-0.159919	0.000250705	-0.194146	0.118283	0.02259	0.603488	-0.246039	2.33975e-05	-0.24167	0.00135891	-0.0845949	0.0534092	0.120397	0.0203611	-0.194904	8.38408e-06	-0.168295	0.000161184	-0.198828	0.0648633	-0.0339613	0.483977	0.26081	0.000421595	-0.124888	0.0929941	-0.361365	9.56e-17	-0.107443	0.308003	-0.237445
HALLMARK_MYC_TARGETS_V2	-0.19823	0.0839508	0.0836433	0.0919491	-0.0309534	0.30548	0.0078282	0.891522	0.438678	0.00744293	0.186496	0.00147723	-0.360894	0.0126968	0.235179	0.0013943	-0.292739	0.000135826	0.0391381	0.373101	0.0753991	0.547375	0.295227	3.85627e-12	0.125814	0.0325104	-0.171985	0.0236607	0.0746665	0.0883403	0.200091	0.000104314	-0.0800899	0.0693656	-0.0869728	0.0524189	-0.021831	0.840929	-0.110643	0.0222164	0.447706	3.31e-10	0.177408	0.0165792	0.0427792	0.341721	-0.138009	0.189546	0.277282
HALLMARK_EPITHELIAL_MESENCHYMAL_TRANSITION	0.423709	0.000123151	0.326535	1.44496e-11	0.00915528	0.761866	0.0529471	0.35598	0.240027	0.158525	0.0058681	0.921017	0.158537	0.287168	0.133469	0.0724571	0.442141	2.75595e-09	0.161405	0.00021902	0.382471	0.0015282	0.243119	1.39129e-08	0.157252	0.00739779	-0.0802712	0.29379	0.466361	1.51028e-29	0.37187	1.30354e-13	0.277354	1.50414e-10	0.142569	0.00142338	-0.304634	0.00411956	0.259968	5.03e-08	0.314628	1.79e-05	0.278509	0.000140658	0.289228	5.17e-11	0.105224	0.318158	0.213537
HALLMARK_INFLAMMATORY_RESPONSE	0.685905	5.84215e-12	0.528991	1.00499e-30	0.134178	8.14831e-06	0.437709	9.40186e-16	0.514124	0.00133872	0.102639	0.0820599	0.403024	0.00497267	0.165777	0.0253165	0.789464	2.20939e-36	0.34726	3.5e-16	0.466047	8.02367e-05	0.503267	1.93402e-35	0.528216	3.61981e-22	0.464266	1.24454e-10	0.713586	2.10664e-82	0.462317	4.80051e-21	0.550728	3.50592e-42	0.383841	6.28e-19	0.207581	0.0536995	0.605464	4.59e-44	0.411391	1.06e-08	0.2347	0.00142704	0.263063	2.7e-09	0.123272	0.241725	0.711879
HALLMARK_XENOBIOTIC_METABOLISM	0.301057	0.00780056	0.0339744	0.494293	0.283011	1.13971e-21	0.166031	0.00358307	-0.252001	0.138155	0.297293	2.7479e-07	0.387619	0.00710336	-0.325543	7.31462e-06	0.770535	1.06047e-33	-0.127872	0.00349016	0.415179	0.000527558	0.217159	4.35593e-07	0.277648	1.63369e-06	0.50005	2.47639e-12	0.558891	3.22618e-44	-0.274579	7.67716e-08	0.272523	3.19651e-10	0.138711	0.00191765	0.152256	0.159182	0.495692	7.35e-28	0.225568	0.0023976	0.279633	0.000131834	0.347103	1.73e-15	0.0586907	0.5784	0.546186
HALLMARK_FATTY_ACID_METABOLISM	0.054291	0.639102	-0.277847	1.19286e-08	0.161647	7.21645e-08	-0.143634	0.0118916	-0.231581	0.174144	0.187444	0.00139555	0.14192	0.341307	-0.244995	0.000858088	0.455518	7.86551e-10	-0.370142	2.5e-18	-0.412964	0.000568927	-0.201699	2.79799e-06	0.0912149	0.121824	0.30654	4.09843e-05	0.0737698	0.0922402	-0.323875	1.65598e-10	0.0086222	0.845239	0.0102347	0.819779	0.124003	0.252491	0.443643	5.12e-22	0.0390662	0.603617	0.11549	0.120542	-0.160463	0.000333293	0.0373445	0.723772	0.221641
HALLMARK_OXIDATIVE_PHOSPHORYLATION	-0.0934653	0.418796	-0.157027	0.00148347	0.089225	0.00308536	-0.156527	0.00607284	-0.164183	0.338646	0.144354	0.0142076	-0.187382	0.207223	-0.151306	0.0414587	0.208025	0.00733565	-0.205001	2.43e-06	-0.386979	0.00132821	-0.134969	0.00182643	-0.0318636	0.589562	0.344702	3.41554e-06	-0.139367	0.00141231	-0.31713	4.11017e-10	-0.0422522	0.338591	-0.0185391	0.679817	0.285837	0.00727925	0.25073	1.52e-07	-0.112324	0.134391	-0.0898081	0.227945	-0.154952	0.00053382	0.0691797	0.512299	-0.0603367
HALLMARK_GLYCOLYSIS	0.0810183	0.483642	0.273385	2.07637e-08	0.00666797	0.825325	0.0166319	0.771993	-0.0334509	0.846429	0.239125	4.13027e-05	0.162884	0.273986	0.00973554	0.89622	0.382605	3.94466e-07	0.13578	0.00191441	0.314269	0.0101752	0.41189	3.6766e-23	0.0829916	0.159377	0.340562	4.54591e-06	0.533923	8.35959e-40	0.283392	2.7862e-08	0.162459	0.000213521	0.00318489	0.943481	-0.0389422	0.72026	0.278822	4.59e-09	0.438451	8.32e-10	0.276965	0.000153683	0.16004	0.000345754	0.219376	0.0356342	0.124518
HALLMARK_REACTIVE_OXYGEN_SPECIES_PATHWAY	0.362836	0.00118248	0.383077	1.12675e-15	0.1919	1.44339e-10	0.204436	0.000318672	0.107802	0.531438	0.326608	1.38689e-08	0.0801927	0.592074	0.10645	0.152642	0.674996	2.74666e-23	-0.196709	6.21e-06	0.418199	0.000475567	0.518577	6.94011e-38	0.376757	3.52602e-11	0.488613	9.10131e-12	0.486878	2.00762e-32	0.418355	3.75785e-17	0.264552	1.07387e-09	0.130674	0.00348555	0.180269	0.0947545	0.462546	5.03e-24	0.46443	5.81e-11	0.279151	0.000135555	0.32639	8.93e-14	0.155271	0.139429	0.44145
HALLMARK_P53_PATHWAY	0.562535	1.0124e-07	0.35103	3.02304e-13	0.315017	1.01643e-26	0.300813	8.08043e-08	0.216371	0.204981	0.411307	3.48417e-13	0.395896	0.00587675	0.356696	7.7133e-07	0.714947	4.03874e-27	0.0816127	0.0629307	0.597627	1.17197e-07	0.394737	3.03228e-21	0.358366	3.48558e-10	0.480647	2.1911e-11	0.628112	1.22913e-58	0.419409	3.0766e-17	0.474288	3.02627e-30	0.228908	2.42e-07	0.27535	0.00984427	0.479408	6.35e-26	0.565981	1.51e-16	0.311291	1.89e-05	0.493266	8.95e-32	0.0538199	0.610378	0.547603
HALLMARK_UV_RESPONSE_UP	0.0303517	0.793291	0.182726	0.000210333	0.0505416	0.0941475	0.151746	0.00783687	-0.0421111	0.807341	0.308595	9.02791e-08	0.0556651	0.710166	0.0423516	0.570257	0.335069	1.08667e-05	-0.0388487	0.376648	0.296276	0.0157147	0.288937	1.13919e-11	0.275311	2.01265e-06	0.261822	0.000502028	0.136009	0.00184268	0.284627	2.41041e-08	0.227175	1.87645e-07	0.144802	0.00119383	-0.0704341	0.516811	0.327092	4.19e-12	0.0885596	0.238452	-0.011784	0.874548	0.235188	1.16e-07	0.0340265	0.747451	-0.137045
HALLMARK_UV_RESPONSE_DN	0.178082	0.121258	0.121264	0.0143684	-0.210684	1.75597e-12	-0.10738	0.0606394	0.0618011	0.720296	-0.263657	5.74788e-06	-0.050581	0.735631	-0.159492	0.0315058	0.10282	0.188783	0.010164	0.817142	-0.278234	0.0236933	-0.288275	1.27478e-11	-0.24973	1.74491e-05	-0.280723	0.000183235	-0.155019	0.000378299	-0.0684023	0.188639	0.00943764	0.830813	0.0189348	0.673372	-0.364195	0.000524827	0.0147392	0.761361	-0.00553311	0.9414	0.0281128	0.706379	-0.169242	0.000152455	0.0400053	0.704968	-0.247847
HALLMARK_ANGIOGENESIS	0.411733	0.000198989	0.257179	1.4312e-07	0.011693	0.698732	0.08887	0.12083	0.14095	0.412238	-0.0508024	0.390367	0.088052	0.556167	-0.0211687	0.776682	0.362537	1.70742e-06	0.164404	0.000166136	0.313847	0.0102825	0.0646603	0.13674	0.0768759	0.192522	-0.0976386	0.201256	0.439837	4.17139e-26	0.335817	3.13093e-11	0.210883	1.3759e-06	0.127561	0.00435633	-0.264372	0.0133449	0.215347	7.13e-06	0.0760869	0.31139	0.263972	0.000317344	0.128496	0.00415165	0.118461	0.260729	0.1604
HALLMARK_HEME_METABOLISM	0.0599367	0.604594	0.0231761	0.641084	-0.133021	9.7597e-06	-0.0258838	0.651987	-0.363272	0.029427	-0.0622572	0.292356	0.143477	0.335985	-0.0830741	0.264877	0.300367	8.86015e-05	-0.11939	0.00641647	-0.24041	0.0518469	-0.288874	1.15153e-11	-0.123101	0.0364736	-0.36165	1.01467e-06	0.0527974	0.228501	-0.2404	2.81777e-06	0.0337075	0.445283	0.0573603	0.201291	0.0773086	0.476636	0.236474	7.72e-07	-0.278999	0.000155589	-0.0804417	0.280369	-0.343816	3.29e-15	0.123888	0.23936	-0.0557604
HALLMARK_COAGULATION	0.696061	2.10396e-12	0.439469	1.19683e-20	0.232525	6.02605e-15	0.288121	2.91907e-07	-0.166986	0.330349	0.161721	0.00594696	0.268172	0.0683738	-0.183405	0.0132018	0.706798	2.75586e-26	0.283012	4.93e-11	0.54872	1.84105e-06	0.430266	2.43062e-25	0.492188	4.87484e-19	0.334974	6.6437e-06	0.659748	1.59365e-66	-0.0915944	0.0780719	0.423125	8.72388e-24	0.22956	2.23e-07	-0.0554358	0.610062	0.465679	2.28e-24	0.418012	5.81e-09	0.388389	6.04e-08	0.50043	8.54e-33	0.112438	0.285924	0.565029
HALLMARK_IL2_STAT5_SIGNALING	0.679524	1.08694e-11	0.450389	1.00484e-21	0.0938272	0.00185578	0.289149	2.63681e-07	0.59171	0.000144175	0.0825044	0.162582	0.307628	0.0354212	-0.061625	0.408563	0.752572	2.19922e-31	0.193972	8.39e-06	0.371564	0.00212843	0.376317	2.62188e-19	0.421255	7.35736e-14	0.174765	0.0214628	0.709359	5.02992e-81	0.504799	2.20619e-25	0.492886	7.05844e-33	0.264435	2.06e-09	-0.0975324	0.368808	0.542817	4.33e-34	0.372708	2.78e-07	0.32126	9.78e-06	0.327525	7.25e-14	0.0568191	0.590596	0.666802
HALLMARK_BILE_ACID_METABOLISM	-0.0226308	0.84511	-0.305002	3.28625e-10	0.172275	9.19181e-09	-0.0712416	0.213979	-0.315538	0.0608445	0.0835864	0.157122	0.362301	0.0123287	-0.422736	2.76811e-09	0.440507	3.20015e-09	-0.240377	2.86e-08	-0.355927	0.0033568	-0.0921289	0.0337975	0.107844	0.0671374	0.0772385	0.312467	0.20449	2.46841e-06	-0.430708	3.44713e-18	0.0455465	0.302242	0.0544236	0.225375	0.351292	0.000849194	0.249125	1.84e-07	-0.372057	2.93e-07	0.0255447	0.732126	-0.103997	0.0205278	0.0575596	0.585757	0.136693
HALLMARK_PEROXISOME	-0.370214	0.000919469	-0.389261	3.55957e-16	0.116288	0.000112434	-0.26218	3.33425e-06	-0.249846	0.141673	0.0311986	0.597997	0.111605	0.455146	-0.212531	0.00397142	0.479629	7.12584e-11	-0.318052	1.09e-13	-0.349456	0.0040272	-0.0638838	0.141525	0.00335656	0.954693	0.241064	0.00139848	0.17296	7.12206e-05	-0.380933	2.93833e-14	0.000221857	0.995993	-0.025527	0.569818	0.140693	0.193672	0.307303	8.63e-11	0.0227086	0.762857	-0.00105084	0.988767	-0.154784	0.000541439	-0.0150615	0.886687	0.00350858
HALLMARK_ALLOGRAFT_REJECTION	0.798444	3.39667e-18	0.518881	1.9713e-29	0.183859	8.36616e-10	0.369671	2.41938e-11	0.549475	0.000518621	0.164034	0.00526157	0.256003	0.0824082	0.0668319	0.370038	0.839194	5.6371e-45	0.169436	0.000103371	0.601946	8.98556e-08	0.649284	6.94979e-65	0.599632	1.3239e-29	0.354875	1.66229e-06	0.805637	2.5155e-120	0.542781	8.23888e-30	0.518609	8.53521e-37	0.369769	1.4e-17	0.296642	0.00527138	0.616638	4.4e-46	0.385825	9.62e-08	0.402135	1.83e-08	0.440475	5.88e-25	0.108677	0.302446	0.721471
HALLMARK_SPERMATOGENESIS	-0.409038	0.000221138	-0.211321	1.71747e-05	-0.314454	1.26284e-26	-0.346966	4.39e-10	-0.0659553	0.702326	-0.210812	0.000315047	-0.104633	0.483967	0.0239779	0.747986	-0.50936	2.81656e-12	-0.272788	2.52e-10	-0.389813	0.00121489	-0.207559	1.40537e-06	-0.303974	1.36127e-07	-0.219634	0.00369098	-0.522768	5.993e-38	0.0608449	0.24237	-0.313064	3.57207e-13	-0.25287	1.05e-08	-0.146673	0.175217	-0.42169	7.73e-20	-0.415352	7.41e-09	-0.387	6.79e-08	-0.209313	2.58e-06	-0.0650614	0.537784	-0.377288
HALLMARK_KRAS_SIGNALING_UP	0.633716	6.17051e-10	0.425343	2.59059e-19	0.0562226	0.0625541	0.26925	1.75978e-06	0.305354	0.0701417	0.0416495	0.481404	0.238105	0.10703	-0.146237	0.0488553	0.70234	7.66464e-26	0.245459	1.42e-08	0.423181	0.000399906	0.319355	4.6985e-14	0.425079	4.14244e-14	0.185918	0.0143239	0.592177	1.02352e-50	0.363688	4.80976e-13	0.488328	3.22781e-32	0.259481	4.18e-09	-0.159017	0.141254	0.524648	1.43e-31	0.323692	9.87e-06	0.247218	0.000766658	0.342817	4e-15	0.123145	0.242213	0.662008
HALLMARK_KRAS_SIGNALING_DN	-0.278452	0.0142006	0.0283469	0.56852	0.0861642	0.00427388	0.0984279	0.0856299	-0.380133	0.0222012	0.116712	0.0478357	0.131706	0.377522	0.316354	1.357e-05	-0.301118	8.48977e-05	-0.0857635	0.0506296	-0.227613	0.0660602	-0.114465	0.00828723	-0.00772511	0.895965	-0.0995515	0.192526	-0.346446	3.63498e-16	-0.2332	5.64323e-06	-0.0550156	0.212613	0.0287915	0.521506	0.0523028	0.63043	-0.213403	8.66e-06	0.260613	0.000426019	-0.16414	0.026818	0.391289	1.35e-19	-0.0270786	0.797777	-0.376137
HALLMARK_PANCREAS_BETA_CELLS	0.0280964	0.808346	-0.0403578	0.416784	-0.11898	7.74738e-05	-0.129225	0.023775	-0.0736938	0.669278	-0.0783536	0.184853	-0.168483	0.257603	-0.473736	1.4335e-11	-0.278046	0.000299213	-0.159554	0.000259138	-0.23883	0.0534534	-0.169849	8.37882e-05	0.090137	0.126314	0.197679	0.00913424	-0.671094	1.36394e-69	-0.407644	2.75827e-16	-0.249698	9.24543e-09	-0.176393	7.57e-05	-0.167462	0.121055	-0.0065665	0.89238	-0.44782	3.27e-10	-0.154339	0.0374996	0.0931742	0.0380453	-0.0347503	0.742265	-0.363203
[truncated: 17 more columns]

## Sheet: Table S4
Signatures	ACC		BLCA		BRCA		CESC		CHOL		COAD		READ		DLBC		ESCA		GBM		HNSC		KICH		KIRC		KIRP		LGG		LIHC		LUAD		LUSC		MESO		OV		PAAD		PCPG		PRAD		SARC		SKCM
	correlation	p value	correlation	p value	cor	p value	cor	p value	cor	p value	cor	p value	cor	p value	cor	p value	cor	p value	cor	p value	cor	p value	cor	p value	cor	p value	cor	p value	cor	p value	cor	p value	cor	p value	cor	p value	cor	p value	cor	p value	cor	p value	cor	p value	cor	p value	cor	p value	cor
CD_8_T_effector	0.650223	1.55786e-10	0.406755	1.19544e-17	0.135565	6.54978e-06	0.256837	5.33937e-06	0.424568	0.00985431	0.188112	0.00134052	-0.00176137	0.986705	0.220931	0.135608	0.0997596	0.180277	0.426763	1.09088e-08	0.105609	0.0159875	0.407025	0.000694764	0.434131	8.12792e-26	0.363655	1.8304e-10	-0.0573966	0.453207	0.355492	5.39403e-17	0.313866	6.33011e-10	0.25241	6.30434e-09	0.279178	2.28318e-10	0.254521	0.01736	0.45039	1.01648e-22	0.23603	0.00146862	0.234865	0.00141568	0.214884	1.36433e-06	0.460806
Immune_Checkpoint	0.643804	2.687e-10	0.400045	4.50015e-17	0.155246	2.34387e-07	0.233886	3.59562e-05	0.413646	0.0121505	0.135793	0.0211578	0.00502254	0.962102	0.29222	0.0462448	0.0850862	0.253438	0.471714	1.60018e-10	0.110538	0.0116582	0.489519	3.02919e-05	0.467394	3.5768e-30	0.457326	2.41876e-16	-0.136232	0.0739054	0.552391	4.93888e-43	0.445468	1.74064e-19	0.350736	2.36195e-16	0.244835	3.12222e-08	0.18121	0.0930146	0.383625	2.02479e-16	0.333547	5.05164e-06	0.162229	0.028668	0.287627	6.66349e-11	0.486569
Antigen_processing_machinery	0.395837	0.000366136	0.49094	4.46736e-26	0.21306	9.75002e-13	0.355288	1.55832e-10	0.133731	0.436821	0.43426	1.12551e-14	0.344323	0.000776978	0.477451	0.000689828	0.11118	0.135123	0.370976	9.33197e-07	0.302443	1.84348e-12	0.246116	0.0463699	0.317812	6.30476e-14	0.404758	8.07958e-13	0.292212	9.5764e-05	0.509202	8.77939e-36	0.357259	1.30732e-12	0.439623	9.46456e-26	0.357211	1.96255e-16	0.375743	0.000335321	0.389318	6.64923e-17	0.437485	9.15057e-10	0.27943	0.000133386	0.271027	8.4606e-10	0.444095
Mismatch_Repair	-0.260531	0.0221122	-0.133841	0.00685084	-0.21104	1.60858e-12	-0.174186	0.0022286	-0.107648	0.532028	0.0470571	0.426291	-0.00774819	0.941565	-0.33524	0.0212503	0.0857148	0.249935	-0.433291	6.13436e-09	-0.222144	3.09542e-07	-0.0269397	0.829988	-0.0232072	0.593628	-0.237706	4.46213e-05	-0.10446	0.171395	-0.0752097	0.0860426	0.0976373	0.0602755	-0.156079	0.000377689	-0.234314	1.22578e-07	-0.213878	0.0466853	-0.2019	2.6319e-05	0.218513	0.00329674	-0.037919	0.611304	-0.28023	2.11142e-10	-0.452655
Nucleotide_excision_repair	-0.287267	0.0113038	-0.110956	0.0251891	-0.202022	1.41499e-11	-0.204217	0.000323547	-0.268597	0.113201	0.0568157	0.336664	-0.0475794	0.652436	-0.302491	0.03877	0.062942	0.398602	-0.446591	1.82696e-09	-0.213262	9.20145e-07	-0.082817	0.508555	-0.172948	6.17175e-05	-0.28847	6.06328e-07	-0.188128	0.013187	-0.0991412	0.0234965	0.0208635	0.688754	-0.183535	2.78227e-05	-0.251332	1.29954e-08	-0.189848	0.0782	-0.153534	0.00146159	0.1045	0.163882	-0.0626859	0.400527	-0.312639	1.04378e-12	-0.476386
DNA_damage_response	-0.220005	0.0545317	-0.140773	0.00443518	-0.205348	6.41943e-12	-0.258088	4.78644e-06	-0.171777	0.316459	0.00930952	0.875005	-0.077293	0.463968	-0.307773	0.0353302	0.0800635	0.282643	-0.553636	1.23267e-14	-0.230535	1.06e-07	-0.0558765	0.655873	-0.0737764	0.0894378	-0.284966	8.39572e-07	-0.23514	0.00184476	-0.108707	0.0129524	0.0725594	0.163102	-0.218166	5.75398e-07	-0.225979	3.46329e-07	-0.25948	0.0152249	-0.223444	3.1196e-06	0.254618	0.000582676	-0.0676818	0.363969	-0.268919	1.15425e-09	-0.461241
DNA_replication	-0.180572	0.116057	-0.0631219	0.203805	-0.165844	3.2487e-08	-0.147715	0.00966495	-0.111088	0.518922	0.144724	0.0139587	-0.0117307	0.91163	-0.279502	0.0570818	0.162069	0.0288277	-0.467823	2.36388e-10	-0.19846	5.11205e-06	-0.0328687	0.793325	0.00434982	0.920345	-0.245072	2.52459e-05	-0.121438	0.111477	-0.0658794	0.132789	0.10417	0.044948	-0.149342	0.000673977	-0.204411	4.24947e-06	-0.178802	0.0975175	-0.167483	0.000510268	0.297819	5.14606e-05	0.00847594	0.909586	-0.192943	1.51213e-05	-0.389506
Base_excision_repair	-0.167727	0.14482	0.0256091	0.606455	-0.0661425	0.0284079	-0.14737	0.0098378	-0.233127	0.171207	0.169408	0.00393522	-0.0479372	0.649993	-0.263529	0.0734856	0.20221	0.00619065	-0.47952	7.20685e-11	-0.153677	0.00043668	-0.0147869	0.906194	0.0975794	0.0245358	-0.0863786	0.142972	-0.14367	0.0593244	-0.000851636	0.984513	0.145781	0.00490036	-0.154547	0.000431752	-0.161056	0.000307786	-0.151099	0.162411	-0.154814	0.00133172	0.334466	4.73979e-06	0.0560721	0.452151	-0.13364	0.00286212	-0.34097
Pan_F_TBRs	0.0862714	0.455644	0.137439	0.00547964	-0.0542089	0.072567	-0.0880811	0.124177	0.11771	0.494152	0.0157084	0.790672	0.0921365	0.38238	-0.0813818	0.586575	0.0641194	0.389821	0.116757	0.135311	-0.0206143	0.639071	0.129634	0.299544	0.156409	0.000296903	0.0618255	0.294878	-0.18767	0.013416	0.133497	0.00223986	0.282098	3.24033e-08	0.176929	5.40691e-05	0.0194376	0.665219	-0.391544	0.000176726	0.147793	0.00219956	0.290628	7.9259e-05	0.371939	2.34288e-07	0.282405	1.50953e-10	-0.432414
EMT1	-0.111698	0.333472	-0.294366	1.40403e-09	0.124461	3.54115e-05	-0.205264	0.000300905	0.106216	0.537532	0.35232	7.67844e-10	0.295928	0.00418227	0.104374	0.485056	-0.383767	8.90151e-08	0.0420419	0.591842	-0.328303	1.56125e-14	-0.0493798	0.693774	-0.0212321	0.625434	0.076447	0.195022	0.0599967	0.43297	0.217087	5.50547e-07	0.133647	0.00996283	-0.085251	0.0531779	-0.0986139	0.0277718	0.0128064	0.906284	0.0370468	0.445134	0.195546	0.008709	0.29658	4.79563e-05	-0.0162644	0.717848	-0.175803
EMT2	0.0406753	0.725415	0.29691	9.97335e-10	0.108724	0.000307019	0.0407114	0.47799	0.214873	0.208212	0.0518999	0.380198	0.112045	0.287619	0.215782	0.145194	0.172098	0.0201743	0.381693	4.22543e-07	0.11593	0.00814058	0.437184	0.00024219	0.183279	2.14275e-05	0.134635	0.022061	-0.104562	0.170971	0.354633	6.48256e-17	0.307265	1.49195e-09	0.27156	3.70853e-10	0.108795	0.0151415	-0.0833204	0.442929	0.151583	0.00168205	0.315614	1.68077e-05	0.34093	2.48238e-06	0.312397	1.08871e-12	-0.0625113
EMT3	0.0373041	0.747377	0.15491	0.00172136	-0.0367734	0.223395	-0.0660301	0.249492	-0.0180875	0.916611	0.0910642	0.123099	0.0430548	0.683633	-0.0468036	0.754736	-0.303965	3.02483e-05	0.0639871	0.414204	-0.0120896	0.783292	0.0617343	0.622423	-0.125437	0.00378996	-0.0871889	0.139246	-0.283075	0.000160806	0.0108917	0.803936	0.225612	1.14593e-05	0.160118	0.00026389	0.0400711	0.372214	-0.242437	0.023669	0.0133035	0.784	0.355091	1.07492e-06	0.175934	0.0175163	-0.00678865	0.880125	-0.375739
[truncated: 19 more columns]

## Sheet: Table S5
ESTIMATE score	ACC		BLCA		BRCA		CESC		CHOL		COAD		READ		DLBC		ESCA		GBM		HNSC		KICH		KIRC		KIRP		LGG		LIHC		LUAD		LUSC		MESO		OV		PAAD		PCPG		PRAD		SARC		SKCM
	correlation	p value	correlation	p value	cor	p value	cor	p value	cor	p value	cor	p value	cor	p value	cor	p value	cor	p value	cor	p value	cor	p value	cor	p value	cor	p value	cor	p value	cor	p value	cor	p value	cor	p value	cor	p value	cor	p value	cor	p value	cor	p value	cor	p value	cor	p value	cor	p value	cor
ImmuneScore	0.815932	1.5902e-19	0.517606	1.77797e-29	0.27312	2.86223e-20	0.359223	9.44794e-11	0.544213	0.000601241	0.0782597	0.175678	0.132506	0.207983	0.332473	0.0224112	0.047269	0.554073	0.878915	2.79114e-54	0.169115	0.000145014	0.696724	1.15164e-10	0.672572	2.5908e-71	0.684553	5.10632e-41	0.520045	1.47392e-11	0.872445	3.97239e-164	0.552063	4.63727e-31	0.526908	1.06176e-38	0.351081	6.83555e-16	0.351158	0.000916127	0.647155	3.11403e-46	0.375509	2.40584e-07	0.474382	1.51859e-11	0.540598	4.62736e-39	0.740234
StromalScore	0.739665	1.54633e-14	0.295716	1.01765e-09	0.123833	3.81729e-05	0.0871346	0.128288	0.371559	0.0256656	-0.0408072	0.480607	0.1151	0.274594	0.231581	0.117287	-0.0428741	0.591542	0.758321	4.1958e-32	0.0916623	0.04048	0.57323	6.01905e-07	0.312487	1.62968e-13	0.463293	1.12255e-16	0.330718	4.29075e-05	0.707018	2.00975e-80	0.347774	5.13969e-12	0.368028	3.21263e-18	0.1948	1.19649e-05	-0.178896	0.0993405	0.392927	2.09634e-15	0.196369	0.00861245	0.403709	1.74618e-08	0.292533	2.90689e-11	0.535318
TumorPurity	-0.791255	1.09729e-17	-0.425602	1.81044e-19	-0.223138	7.05504e-14	-0.270596	1.55486e-06	-0.478545	0.00315385	-0.00706155	0.902895	-0.123681	0.240155	-0.334208	0.0216774	0.00154	0.984629	-0.828035	8.24248e-43	-0.127973	0.00415451	-0.655404	3.13566e-09	-0.577024	1.50525e-48	-0.61349	4.58101e-31	-0.46999	1.903e-09	-0.790144	7.6356e-113	-0.496869	1.37339e-24	-0.484005	4.55843e-32	-0.295426	1.73365e-11	-0.143632	0.187051	-0.554069	8.44609e-32	-0.254323	0.000613243	-0.488053	3.19211e-12	-0.449589	4.23002e-26	-0.724992
[truncated: 17 more columns]

## Sheet: Table S6
Symbol	ACC		BLCA		BRCA		CESC		CHOL		COAD		READ		DLBC		ESCA		GBM		HNSC		KICH		KIRC		KIRP		LGG		LIHC		LUAD		LUSC		MESO		OV		PAAD		PCPG		PRAD		SARC		SKCM
	correlation	p value	correlation	p value	cor	p value	cor	p value	cor	p value	cor	p value	cor	p value	cor	p value	cor	p value	cor	p value	cor	p value	cor	p value	cor	p value	cor	p value	cor	p value	cor	p value	cor	p value	cor	p value	cor	p value	cor	p value	cor	p value	cor	p value	cor	p value	cor	p value	cor
CD4_naive	-0.579516	3.34673e-08	-0.203432	3.553e-05	-0.0594489	0.0489071	-0.0698546	0.223055	-0.213005	0.212287	-0.221056	0.000177716	-0.0635885	0.547047	0.0126744	0.932615	-0.0244235	0.743464	-0.0507892	0.518369	-0.0539725	0.219186	-0.232481	0.060323	-0.200728	3.13018e-06	-0.239727	3.82333e-05	-0.137733	0.00160863	-0.0321141	0.537476	-0.1051	0.0171447	-0.116956	0.00899101	-0.24751	0.0208153	-0.27006	1.63365e-06	-0.00262469	0.972183	-0.17579	0.0176105	-0.206858	3.38983e-06	-0.401652	1.40995e-11	-0.135887
CD8_naive	-0.386876	0.000509562	-0.437355	1.9138e-20	-0.0648135	0.0317552	-0.350728	2.75922e-10	0.0136534	0.937006	-0.219402	0.000199217	-0.0249455	0.813406	-0.125122	0.402032	-0.184429	0.0126897	-0.51468	1.78726e-12	-0.198396	5.14897e-06	-0.270839	0.0278388	-0.354667	3.48503e-17	-0.410974	3.3262e-13	-0.485784	2.89032e-32	-0.0882486	0.0896277	-0.331087	1.29426e-14	-0.254233	8.71571e-09	-0.398677	0.000130942	-0.567124	1.93425e-27	-0.135845	0.0698057	0.029517	0.692438	-0.078104	0.0822592	-0.357192	2.6569e-09	-0.251157
Tc	0.718455	1.89298e-13	0.418341	1.1285e-18	0.203586	9.7742e-12	0.273807	1.1543e-06	0.423506	0.0100602	0.243108	3.56815e-05	0.0433001	0.681928	0.475543	0.000729808	0.15418	0.0376992	0.518576	1.13737e-12	0.0873844	0.0464056	0.526772	5.53122e-06	0.262724	7.84099e-10	0.449377	9.04379e-16	0.255285	3.28041e-09	0.239882	2.96435e-06	0.307755	9.73733e-13	0.2411	5.11064e-08	0.529499	1.34044e-07	0.548739	1.8505e-25	0.258687	0.000471484	0.250003	0.0006648	0.468378	2.06126e-28	0.520778	1.29226e-19	0.308493
Tex	0.529947	7.18065e-07	0.410611	5.50524e-18	0.183785	8.50005e-10	0.256291	5.59927e-06	0.271518	0.109184	0.225143	0.000133509	0.00473022	0.964306	0.259783	0.0778258	0.277812	0.000146408	0.378652	5.74922e-07	0.145551	0.000872141	0.682568	2.75226e-10	0.463887	1.08557e-29	0.407215	5.70218e-13	0.375629	6.1582e-19	0.371683	1.34344e-13	0.295417	8.23608e-12	0.297849	1.16353e-11	0.199971	0.0633071	0.53861	2.02943e-24	0.150339	0.0445653	0.0283964	0.703556	0.230048	2.21729e-07	0.4978	8.22389e-18	0.342828
Tr1	0.0645977	0.576739	0.0396309	0.425231	-0.0839617	0.00537079	-0.0170469	0.766466	0.354571	0.0338522	-0.0277348	0.642221	0.0810507	0.44246	0.00731637	0.961072	-0.155273	0.0363467	0.21568	0.00554318	-0.119446	0.00639129	0.192211	0.122069	0.365435	3.20736e-18	0.264646	5.0896e-06	0.0971393	0.0264661	-0.103714	0.0459002	0.0834052	0.0588093	-0.0158087	0.724898	-0.043812	0.686996	-0.23368	3.6547e-05	0.135383	0.070772	0.11519	0.121515	0.119331	0.00780384	-0.0593665	0.338476	-0.0478697
nTreg	0.305115	0.00697066	0.000872002	0.986008	-0.172478	8.82445e-09	0.12171	0.0333161	0.233729	0.170072	0.163558	0.00581766	-0.0113202	0.914711	-0.0238046	0.873807	-0.098677	0.185075	0.193237	0.0131703	0.206741	1.98913e-06	0.134258	0.282484	0.155338	0.000327006	0.0303576	0.607279	-0.133259	0.00228132	0.158148	0.00224969	-0.168758	0.000120901	0.0799942	0.0745021	-0.204687	0.0572014	0.197874	0.000498243	0.137974	0.0654973	-0.146678	0.0481714	-0.308287	2.21456e-12	0.17362	0.00482817	-0.0968408
iTreg	0.479976	9.9999e-06	0.247627	4.20718e-07	-0.0597923	0.0476141	0.163599	0.00411169	0.234069	0.169434	0.0436867	0.464155	-0.217961	0.0368715	-0.0662748	0.658048	0.025871	0.728837	0.25065	0.00120724	0.0582682	0.184624	0.343851	0.00470114	0.286143	1.82743e-11	0.190225	0.00115598	0.108332	0.0132693	0.13183	0.0110297	0.10729	0.0149516	0.189439	2.08605e-05	-0.121422	0.262579	0.376321	9.90485e-12	0.109021	0.146302	0.114882	0.12252	-0.0459402	0.307209	0.370952	5.71031e-10	-0.01541
Th1	0.677389	1.33329e-11	0.422224	5.01109e-19	0.128135	2.05692e-05	0.259409	4.26199e-06	0.514968	0.00131026	0.182988	0.0019958	-0.0780693	0.459478	0.0743518	0.619406	0.105151	0.157741	0.404958	7.50947e-08	0.190028	1.28472e-05	0.340649	0.00512917	0.395052	2.80303e-21	0.278306	1.54e-06	0.446446	6.17741e-27	0.344568	8.81987e-12	0.109741	0.0127936	0.203169	4.87111e-06	0.357221	0.000682441	0.430199	3.24044e-15	0.177598	0.0173884	0.138059	0.0630849	0.314534	7.49413e-13	0.419872	1.30005e-12	0.272626
Th2	0.54312	3.3346e-07	0.200547	4.60312e-05	-0.00557416	0.853624	-0.0119776	0.834704	0.368074	0.0271961	0.138083	0.0201376	-0.0295269	0.779937	0.0859545	0.565649	0.0717108	0.336047	0.467171	2.86147e-10	-0.004409	0.920107	0.312939	0.0105166	-0.0368079	0.397292	0.13389	0.0228142	0.475368	8.7134e-31	0.174742	0.00072365	0.0535445	0.225569	-0.00289154	0.948679	0.137553	0.203907	0.405008	1.65425e-13	0.031642	0.674135	0.257413	0.000451367	0.243895	3.76802e-08	0.0872172	0.15923	0.0826032
Th17	-0.478435	1.07766e-05	-0.224727	4.68447e-06	-0.0393941	0.192102	-0.130044	0.0228937	-0.432411	0.00844298	-0.158609	0.00750993	-0.077784	0.461125	-0.130721	0.381133	-0.174228	0.0186583	0.115092	0.142238	-0.0697066	0.112363	-0.216049	0.0814568	-0.406583	1.47997e-22	-0.490622	6.54226e-19	-0.216596	5.84697e-07	-0.435879	1.2312e-18	-0.21462	9.0486e-07	-0.109705	0.0143086	-0.113777	0.294039	-0.279337	6.84929e-07	-0.11182	0.136161	-0.226637	0.00209395	-0.432708	4.74364e-24	-0.253838	3.21918e-05	-0.267842
Tfh	0.723986	1.00738e-13	0.226359	3.97681e-06	0.206276	5.1368e-12	0.111288	0.0517968	0.401875	0.0151169	0.11844	0.0465177	-0.0140974	0.893896	0.0831559	0.578415	-0.0945744	0.204107	0.355922	2.90753e-06	-0.134238	0.00215759	0.349654	0.00400508	0.416877	9.70836e-24	0.401942	1.20068e-12	0.289344	1.58856e-11	0.263007	2.75421e-07	0.217683	6.25833e-07	0.186586	2.78662e-05	0.294364	0.00564816	0.495239	2.43297e-20	0.179998	0.0159059	0.131258	0.0773602	0.407648	2.78988e-21	0.418366	1.59193e-12	0.302245
Tcm	-0.263054	0.0208108	-0.00228756	0.963304	0.0331048	0.273072	0.00342717	0.95239	0.332544	0.0475187	-0.00117486	0.984301	0.0830076	0.431485	-0.209796	0.15696	-0.202098	0.00621982	-0.247758	0.00138095	-0.163349	0.000183206	-0.388251	0.00127621	0.131987	0.00230666	0.0611946	0.299843	-0.491391	4.39978e-33	0.0329179	0.527337	-0.0206716	0.640094	0.0479938	0.285092	-0.0437834	0.68719	0.301242	7.72904e-08	0.176675	0.0179895	-0.0249291	0.738344	-0.076439	0.0890236	0.0177267	0.775198	0.041925
Tem	0.232093	0.0422429	0.0807472	0.103809	0.035092	0.245299	-0.0251946	0.660668	0.0736459	0.66948	0.0750579	0.208082	-0.100541	0.340291	-0.0604118	0.686669	-0.139438	0.0604717	0.306526	6.55307e-05	0.0687804	0.117228	0.20037	0.106719	-0.0743141	0.0871211	0.0512827	0.385067	0.411232	1.01554e-22	0.0305139	0.557948	-0.187003	1.98091e-05	-0.0640832	0.153306	0.200934	0.0620191	0.312671	2.29915e-08	-0.0137832	0.854702	0.0565846	0.448022	-0.0217669	0.628666	0.0232027	0.708536	0.062418
NKT	0.428554	0.000100899	0.20456	3.20771e-05	0.0762994	0.0114365	0.163243	0.00419481	0.156821	0.361038	-0.0710489	0.23348	0.183627	0.0797504	-0.0135649	0.927893	-0.177971	0.0162329	0.261233	0.000728314	0.121214	0.00564581	0.178974	0.150476	0.155785	0.000314091	0.242261	3.14429e-05	0.00208365	0.962121	0.369059	2.0498e-13	0.211288	1.34322e-06	0.105244	0.0188115	-0.173972	0.107061	0.127113	0.0261829	0.207297	0.00536398	0.231864	0.00163549	0.391864	1.18484e-19	-0.0675917	0.275677	-0.0930881
MAIT	0.509533	2.21525e-06	-0.00266085	0.957321	-0.022475	0.456889	-0.100297	0.0798214	0.365563	0.0283444	-0.0633656	0.288089	0.0400107	0.70493	0.134554	0.367201	-0.154177	0.0377028	0.341351	7.70983e-06	0.092338	0.0352859	0.310773	0.0110941	0.145744	0.000755715	0.300769	1.86727e-07	0.109462	0.0123336	0.197762	0.000125955	0.170012	0.000107375	0.0272058	0.544708	-0.143804	0.183905	0.338027	1.2918e-09	-0.252911	0.000636143	0.30112	3.61785e-05	0.131405	0.00336942	0.238499	9.68329e-05	-0.0239523
DC	0.400954	0.00030188	0.317042	5.90855e-11	-0.0340582	0.25949	0.261325	3.5975e-06	0.458347	0.00493432	0.0740232	0.214438	0.252523	0.0151615	0.255928	0.0825003	0.273517	0.00018696	0.516688	1.41691e-12	0.305912	9.98357e-13	0.391387	0.00115577	0.223778	1.88156e-07	0.476815	8.21613e-18	0.607583	5.47363e-54	0.37773	5.00112e-14	0.370367	3.7147e-18	0.17903	5.87737e-05	0.156148	0.148667	0.354697	1.67889e-10	0.350708	1.48655e-06	0.286604	8.76481e-05	0.022403	0.618666	0.458753	4.84734e-15	0.117169
B_cell	-0.659969	6.639e-11	-0.172932	0.000457512	-0.0297648	0.324436	-0.0499458	0.383939	0.134492	0.434194	-0.108713	0.067827	0.0680073	0.51949	-0.323264	0.0266647	-0.178994	0.0156196	-0.46316	4.24252e-10	-0.243291	1.91858e-08	-0.598093	1.13902e-07	-0.0903571	0.037389	-0.0228145	0.699336	-0.229448	1.15439e-07	0.240874	2.68989e-06	-0.0739013	0.0941957	-0.0638379	0.154889	-0.0463802	0.669686	-0.224321	7.54151e-05	0.187229	0.0120857	-0.0961954	0.196425	0.202555	5.44281e-06	-0.142822	0.0207455	0.0767578
Monocyte	0.0100193	0.931082	0.236876	1.34451e-06	-0.0899902	0.00283964	-0.068869	0.229669	-0.427658	0.00927603	0.0237775	0.69042	0.0483174	0.647402	0.0833499	0.577526	0.139826	0.0597519	0.220476	0.00455587	0.0983114	0.024969	0.392438	0.00111778	-0.0477213	0.272337	0.0794123	0.178211	0.474371	1.19987e-30	-0.147296	0.00446806	0.130784	0.00297186	-0.00115169	0.979547	-0.0297949	0.784123	0.00958254	0.867414	0.194147	0.00921072	0.0792733	0.287436	-0.334488	1.97708e-14	0.175069	0.00448069	-0.264824
Macrophage	0.678287	1.22378e-11	0.402205	2.94657e-17	0.153909	2.98029e-07	0.261165	3.64904e-06	0.276912	0.102052	0.116228	0.0507921	0.139665	0.184236	0.222356	0.13304	0.154011	0.0379111	0.791388	1.86791e-36	0.246136	1.29304e-08	0.669844	7.72793e-10	0.457852	7.12226e-29	0.562158	1.77073e-25	0.820524	2.09997e-128	0.397382	1.74312e-15	0.435335	3.49285e-25	0.19044	1.8825e-05	0.440397	1.96673e-05	0.525366	4.12548e-23	0.291981	7.31372e-05	0.327258	6.50342e-06	0.0424283	0.345699	0.704456	1.35374e-40	0.0820955
NK	0.529915	7.19383e-07	0.344477	8.79682e-13	0.216061	4.59024e-13	0.222763	8.48332e-05	0.285682	0.0912186	0.243625	3.42996e-05	-0.139593	0.184464	0.497588	0.000372866	0.111378	0.134424	0.491643	2.30909e-11	0.114389	0.00903407	0.400942	0.000849365	0.228866	9.69387e-08	0.373562	5.30476e-11	0.338771	1.74874e-15	0.278902	4.69013e-08	0.203089	3.45736e-06	0.26838	1.15695e-09	0.304254	0.00416876	0.404738	1.72253e-13	0.116329	0.120965	0.267099	0.000267408	0.598414	1.66273e-49	0.284116	2.96117e-06	0.351612
Neutrophil	-0.652845	1.24215e-10	-0.299958	6.59181e-10	-0.176148	4.19722e-09	-0.158002	0.00560535	-0.432844	0.00837033	-0.0634931	0.287117	0.0712988	0.499432	-0.0940941	0.529281	-0.0506136	0.497426	-0.463944	3.92981e-10	0.0874068	0.0463491	-0.158414	0.20394	-0.487595	4.61677e-33	-0.477303	7.52788e-18	-0.36647	4.89801e-18	-0.457903	1.25381e-20	-0.292986	1.23952e-11	-0.181193	4.76127e-05	-0.0520323	0.632202	-0.57634	1.76252e-28	-0.297788	5.15566e-05	-0.219008	0.00297437	-0.513394	1.05427e-34	-0.392605	4.36832e-11	-0.257877
Tgd	0.060815	0.5993	-0.0437764	0.378393	0.226083	3.41964e-14	0.0742595	0.195154	-0.0944782	0.583629	0.0934841	0.116619	-0.0918447	0.383896	0.27554	0.0608466	0.075112	0.31357	-0.349947	4.36254e-06	-0.18548	2.07743e-05	0.00605238	0.961532	0.0591544	0.173482	0.172337	0.00329225	0.000462762	0.991584	-0.0463506	0.373336	0.0910533	0.0390572	0.0913226	0.0416417	0.160646	0.137171	0.266961	2.16855e-06	-0.0545827	0.468028	-0.00596612	0.93629	0.363109	6.64353e-17	0.106832	0.0843654	0.393944
CD4_T	0.248065	0.0296091	-0.0751752	0.130005	0.0519188	0.085508	-0.118046	0.0390439	0.378392	0.0228711	-0.0506922	0.395577	-0.0576465	0.58519	-0.0365854	0.807119	-0.351089	1.17737e-06	0.0768041	0.328324	-0.195233	7.30843e-06	0.00919195	0.941607	0.0704919	0.104682	0.0626272	0.288649	0.0734628	0.093607	0.129083	0.012834	0.00476414	0.914195	0.0136452	0.761316	-0.0917461	0.398023	-0.0639336	0.264874	-0.113505	0.130317	0.0899155	0.227388	0.422871	6.17969e-23	-0.103548	0.0944141	0.0832283
CD8_T	0.64915	1.70806e-10	0.149556	0.00248699	0.266334	2.76125e-19	0.159288	0.00522463	0.287838	0.0886966	0.246611	2.72577e-05	0.0123545	0.906951	0.447843	0.00159634	0.08567	0.250184	0.277629	0.00031918	-0.0133589	0.761196	0.371119	0.00215685	0.562217	1.39928e-45	0.427441	2.8946e-14	-0.0126126	0.773741	0.299996	3.74313e-09	0.133775	0.00237226	0.171784	0.000116892	0.320795	0.00245046	0.341664	8.36133e-10	0.148314	0.0475484	0.185463	0.0121904	0.414026	5.78992e-22	0.363594	1.31113e-09	0.359279
[truncated: 15 more columns]

## Sheet: Table S7
Symbol	ACC		BLCA		BRCA		CESC		CHOL		COAD		READ		DLBC		ESCA		GBM		HNSC		KICH		KIRC		KIRP		LGG		LIHC		LUAD		LUSC		MESO		OV		PAAD		PCPG		PRAD		SARC		SKCM
	correlation	p value	correlation	p value	cor	p value	cor	p value	cor	p value	cor	p value	cor	p value	cor	p value	cor	p value	cor	p value	cor	p value	cor	p value	cor	p value	cor	p value	cor	p value	cor	p value	cor	p value	cor	p value	cor	p value	cor	p value	cor	p value	cor	p value	cor	p value	cor	p value	cor
TMB	-0.16033	0.163648	-0.0690422	0.164453	0.0304426	0.340845	-0.0644124	0.277625	-0.65045	1.75185e-05	0.0364859	0.54319	-0.252038	0.0178411	-0.0937263	0.58111	-0.0562728	0.453066	-0.128328	0.121377	-0.0827123	0.0656806	-0.0960308	0.443066	0.0824569	0.132615	0.0450765	0.453299	0.00635509	0.887503	-0.0908241	0.0866029	-0.174151	8.63258e-05	-0.0101519	0.823534	-0.084252	0.45746	-0.0459075	0.425902	-0.0909627	0.265057	-0.184581	0.0141903	-0.0160338	0.725496	0.117361	0.0731543	-0.0293746
[truncated: 15 more columns]

## Sheet: Table S8
Symbol	ACC		BLCA		BRCA		CESC		CHOL		COAD		READ		DLBC		ESCA		GBM		HNSC		KICH		KIRC		KIRP		LGG		LIHC		LUAD		LUSC		MESO		OV		PAAD		PCPG		PRAD		SARC		SKCM
	correlation	p value	correlation	p value	cor	p value	cor	p value	cor	p value	cor	p value	cor	p value	cor	p value	cor	p value	cor	p value	cor	p value	cor	p value	cor	p value	cor	p value	cor	p value	cor	p value	cor	p value	cor	p value	cor	p value	cor	p value	cor	p value	cor	p value	cor	p value	cor	p value	cor
MSI	-0.236954	0.0379954	0.0173953	0.726425	-0.0605854	0.0508996	-0.128366	0.0256983	-0.0286269	0.868367	-0.00860893	0.885353	-0.0321853	0.765943	0.256873	0.0813349	-0.0444317	0.553681	-0.0821291	0.317724	-0.00912417	0.838732	-0.123154	0.324551	0.0733259	0.179307	0.0964907	0.104038	-0.0837921	0.0598853	-0.00320769	0.951167	-0.131718	0.00285205	-0.0890174	0.0489116	-0.133707	0.228174	-0.102031	0.0761746	-0.171476	0.0228728	-0.0292909	0.698747	0.118836	0.00812947	-0.0734076	0.245608	0.0412375
[truncated: 15 more columns]

## Sheet: Table S9
Target	Binding Energy (kcal/mol)
	SNX-2112	AZD7762	PIK-93	selumetinib
NLRP3	-9.368	-8.83	-7.062	-7.95
RIPK3	-8.842	-8.687	-7.339	-7.829
RIPK1	-7.316	-6.269	-5.968	-6.111
CASP6	-6.195	-6.121	-4.94	-5.513
CASP8	-6.574	-6.158	-5.142	-5.368
CASP1	-5.597	-5.718	-5.289	-4.762
